# Supplementary material for: Combination Therapy with Indigo and Indirubin for Ulcerative Colitis via Reinforcing Intestinal Barrier Function
Source: Hindawi journal article supplement (doi:10.1155/2023/2894695), 2023-02-14
Supplement: f1 [file 2894695.f1.pdf]

## Supplementary Materials

Supplementary Table 1 shows the primers used for PCR amplification.

**Table S1 The primers used for PCR amplification**

| <b>Gene symbol</b> | <b>Forward sequence</b>   | <b>Reverse sequence</b> |
|--------------------|---------------------------|-------------------------|
| GAPDH              | GGTTGTCTCCTGCGACTTCA      | TGGTCCAGGGTTTCTTACTCC   |
| ZO-1               | GCCGCTAAGAGCACAGCAA       | TCCCCACTCTGAAAATGAGGA   |
| E-cadherin         | CAGGTCTCCTCATGGCTTTGC     | CTTCCGAAAAGAAGGCTGTCC   |
| Occludin           | TTGAAAGTCCACCTCCTTACAGA   | CCGGATAAAAAGAGTACGCTGG  |
| MUC2               | CGAGCACATCACCTACCACATCATC | TCCAGAATCCAGCCAGCCAGTC  |
